# Supplementary material for: Kinetics of Leptospira interrogans Infection in Hamsters after Intradermal and Subcutaneous Challenge
Source: PubMed Central journal article supplement (PMC4239013; doi:10.1371/journal.pntd.0003307), 2014-11-20
Supplement: pntd.0003307.s002.pdf [file pntd.0003307.s002.pdf]

**Table S1**

|                                    |       |      | <b>Days after Challenge</b> |       |       |       |       |       |       |       |       |       |
|------------------------------------|-------|------|-----------------------------|-------|-------|-------|-------|-------|-------|-------|-------|-------|
|                                    | Route |      | C                           | 1     | 2     | 3     | 4     | 5     | 6     | 7     | 8     | 9     |
| Alkaline Phosphatase (IU/L)        | SQ    | mean | 245.3                       | 218.7 | 232.3 | 259.3 | 313.8 | 502.8 | 978.3 | 487.9 | 245.0 | ND    |
|                                    |       | SD   | 26.0                        | 42.3  | 11.7  | 3.8   | 53.3  | 371.9 | 108.5 | 32.5  | 36.8  | ND    |
|                                    | ID    | mean | 245.3                       | 256.3 | 282.5 | 295.5 | 330.0 | 485.3 | 867.0 | 345.3 | 235.0 | 244.3 |
|                                    |       | SD   | 26.0                        | 33.5  | 3.5   | 0.7   | 47.7  | 277.6 | 173.7 | 73.1  | 31.4  | 27.5  |
| Total Bilirubin (mg/dL)            | SQ    | mean | 0.1                         | 0.1   | 0.1   | 0.1   | 0.2   | 0.1   | 0.8   | 2.1   | 1.9   | ND    |
|                                    |       | SD   | 0.0                         | 0.0   | 0.0   | 0.0   | 0.1   | 0.0   | 0.4   | 2.8   | 2.3   | ND    |
|                                    | ID    | mean | 0.1                         | 0.1   | 0.1   | 0.2   | 0.1   | 0.1   | 0.7   | 0.3   | 0.3   | 0.2   |
|                                    |       | SD   | 0.0                         | 0.0   | 0.0   | 0.1   | 0.1   | 0.0   | 0.7   | 0.2   | 0.1   | 0.1   |
| SGPT (U/L)                         | SQ    | mean | 59.3                        | 51.3  | 40.0  | 56.3  | 62.8  | 58.8  | 109.3 | 87.9  | 64.5  | ND    |
|                                    |       | SD   | 15.4                        | 17.1  | 4.4   | 15.1  | 15.6  | 11.9  | 24.0  | 18.9  | 17.7  | ND    |
|                                    | ID    | mean | 59.3                        | 49.0  | 44.5  | 49.5  | 65.0  | 71.8  | 109.7 | 81.0  | 38.0  | 39.3  |
|                                    |       | SD   | 15.4                        | 4.6   | 10.6  | 3.5   | 19.6  | 10.1  | 17.7  | 14.3  | 3.0   | 12.7  |
| Total Serum Protein (g/dl)         | SQ    | mean | 6.0                         | 5.5   | 5.7   | 5.7   | 6.2   | 6.2   | 7.8   | 7.4   | 7.2   | ND    |
|                                    |       | SD   | 0.2                         | 0.2   | 0.2   | 0.1   | 0.4   | 0.2   | 0.7   | 0.2   | 0.1   | ND    |
|                                    | ID    | mean | 6.0                         | 5.7   | 5.7   | 5.7   | 6.0   | 6.4   | 7.4   | 7.3   | 6.7   | 6.7   |
|                                    |       | SD   | 0.2                         | 0.1   | 0.4   | 0.5   | 0.1   | 0.2   | 0.5   | 0.3   | 0.3   | 0.4   |
| Calcium (mg/dL)                    | SQ    | mean | 15.2                        | 13.9  | 13.4  | 13.4  | 13.9  | 13.4  | 13.9  | 12.1  | 11.5  | ND    |
|                                    |       | SD   | 0.5                         | 0.4   | 0.6   | 0.4   | 0.6   | 0.5   | 0.8   | 1.2   | 0.2   | ND    |
|                                    | ID    | mean | 15.2                        | 14.2  | 13.3  | 12.8  | 14.5  | 14.4  | 13.7  | 11.4  | 11.5  | 13.0  |
|                                    |       | SD   | 0.5                         | 0.5   | 0.2   | 1.7   | 0.9   | 0.5   | 2.5   | 1.9   | 0.5   | 2.6   |
| Phosphorus (mg/dL)                 | SQ    | mean | 11.9                        | 23.8  | 22.8  | 22.0  | 24.1  | 21.8  | 44.8  | 28.1  | 22.2  | ND    |
|                                    |       | SD   | 0.8                         | 3.7   | 5.2   | 2.5   | 4.3   | 5.8   | 7.2   | 2.7   | 1.2   | ND    |
|                                    | ID    | mean | 11.9                        | 25.1  | 28.0  | 22.3  | 20.1  | 22.4  | 40.8  | 27.1  | 24.2  | 15.9  |
|                                    |       | SD   | 0.8                         | 4.2   | 9.1   | 7.2   | 4.7   | 1.9   | 13.3  | 2.6   | 1.4   | 6.1   |
| Glucose (mg/dL)                    | SQ    | mean | 75.7                        | 14.7  | 11.7  | 11.3  | 11.8  | 17.3  | 10.0  | 10.0  | 10.0  | ND    |
|                                    |       | SD   | 35.2                        | 8.1   | 2.9   | 2.3   | 2.4   | 8.4   | 0.0   | 0.0   | 0.0   | ND    |
|                                    | ID    | mean | 75.7                        | 22.7  | 10.0  | 10.0  | 13.3  | 65.3  | 20.7  | 10.0  | 43.0  | 12.3  |
|                                    |       | SD   | 35.2                        | 21.9  | 0.0   | 0.0   | 6.5   | 69.6  | 11.0  | 0.0   | 30.4  | 3.2   |
| Creatinine (mg/dl)                 | SQ    | mean | 0.2                         | 0.3   | 0.3   | 0.3   | 0.3   | 0.4   | 1.5   | 3.1   | 3.5   | ND    |
|                                    |       | SD   | 0.1                         | 0.1   | 0.1   | 0.0   | 0.1   | 0.1   | 0.9   | 0.7   | 0.1   | ND    |
|                                    | ID    | mean | 0.2                         | 0.3   | 0.4   | 0.2   | 0.2   | 0.4   | 2.4   | 3.2   | 5.3   | 2.3   |
|                                    |       | SD   | 0.1                         | 0.1   | 0.1   | 0.0   | 0.0   | 0.1   | 1.6   | 0.5   | 0.7   | 3.6   |
| Blood Urea Nitrogen (mg/dL)        | SQ    | mean | 19.3                        | 24.3  | 23.7  | 23.0  | 22.8  | 26.8  | 77.0  | 176.3 | 191.0 | ND    |
|                                    |       | SD   | 2.3                         | 2.1   | 2.5   | 3.5   | 1.0   | 8.5   | 38.4  | 55.7  | 48.1  | ND    |
|                                    | ID    | mean | 19.3                        | 24.0  | 23.0  | 21.5  | 22.0  | 26.8  | 107.7 | 226.2 | 322.7 | 129.0 |
|                                    |       | SD   | 2.3                         | 2.6   | 0.0   | 3.5   | 3.6   | 3.0   | 71.8  | 79.8  | 57.7  | 169.8 |
| White Blood Count (x1000/ $\mu$ L) | SQ    | mean | 2.9                         | 3.3   | 2.8   | 3.5   | 3.1   | 4.5   | 6.0   | 8.2   | 4.0   | ND    |
|                                    |       | SD   | 0.6                         | 1.7   | 0.5   | 0.6   | 1.2   | 1.7   | 0.2   | 3.2   | 0.8   | ND    |
|                                    | ID    | mean | 2.9                         | 2.1   | 1.5   | 3.4   | 3.0   | 4.2   | 5.6   | 4.9   | 3.1   | 2.5   |
|                                    |       | SD   | 0.6                         | 0.8   | 0.8   | 0.9   | 0.3   | 1.5   | 1.3   | 1.8   | 1.9   | 0.3   |
| Neutrophils (%)                    | SQ    | mean | 16.0                        | 14.7  | 15.7  | 17.3  | 20.3  | 27.8  | 54.0  | 32.9  | 29.0  | ND    |
|                                    |       | SD   | 4.0                         | 5.0   | 5.9   | 2.5   | 4.1   | 9.3   | 10.5  | 14.3  | 4.2   | ND    |
|                                    | ID    | mean | 16.0                        | 10.0  | 19.0  | 13.0  | 18.3  | 33.5  | 45.0  | 28.2  | 25.7  | 23.0  |
|                                    |       | SD   | 4.0                         | 0.0   | 9.9   | 3.0   | 6.7   | 18.6  | 22.9  | 5.7   | 2.1   | 12.1  |
| Lymphocytes (%)                    | SQ    | mean | 76.7                        | 82.3  | 80.7  | 79.3  | 76.3  | 69.3  | 37.3  | 59.8  | 63.5  | ND    |
|                                    |       | SD   | 8.1                         | 5.0   | 6.4   | 2.5   | 4.2   | 9.3   | 12.1  | 16.0  | 6.4   | ND    |
|                                    | ID    | mean | 76.7                        | 65.0  | 49.0  | 63.8  | 63.2  | 51.2  | 35.8  | 56.7  | 53.0  | 56.3  |
|                                    |       | SD   | 8.1                         | 1.2   | 17.7  | 3.0   | 6.6   | 19.3  | 25.7  | 4.4   | 1.7   | 11.5  |

|                                     |    |      |      |      |      |      |      |      |      |      |      |      |
|-------------------------------------|----|------|------|------|------|------|------|------|------|------|------|------|
| Monocytes (%)                       | SQ | mean | 5.0  | 2.0  | 2.7  | 2.3  | 2.8  | 2.0  | 7.3  | 6.3  | 6.5  | ND   |
|                                     |    | SD   | 2.0  | 0.0  | 1.2  | 0.6  | 1.0  | 0.0  | 3.3  | 2.2  | 2.1  | ND   |
| Eosinophils (%)                     | ID | mean | 5.0  | 2.0  | 6.0  | 2.0  | 2.8  | 2.5  | 8.7  | 5.8  | 5.3  | 3.7  |
|                                     |    | SD   | 2.0  | 0.0  | 5.7  | 0.0  | 0.5  | 0.6  | 3.8  | 1.9  | 0.6  | 2.1  |
| Red Blood Cells (xmillion/ $\mu$ L) | SQ | mean | 2.3  | 1.0  | 1.0  | 1.0  | 1.0  | 1.0  | 1.5  | 1.0  | 1.0  | ND   |
|                                     |    | SD   | 2.3  | 0.0  | 0.0  | 0.0  | 0.0  | 0.0  | 1.3  | 0.0  | 0.0  | ND   |
| Hematocrit (%)                      | ID | mean | 2.3  | 1.7  | 2.5  | 1.0  | 1.0  | 1.3  | 0.7  | 1.0  | 1.0  | 1.3  |
|                                     |    | SD   | 2.3  | 1.2  | 2.1  | 0.0  | 0.0  | 0.5  | 0.6  | 0.0  | 0.0  | 0.6  |
| Hemoglobin (g/dL)                   | SQ | mean | 7.8  | 5.9  | 6.9  | 7.0  | 6.6  | 7.5  | 8.4  | 8.7  | 8.1  | ND   |
|                                     |    | SD   | 0.4  | 1.8  | 0.2  | 0.2  | 1.6  | 0.3  | 0.5  | 0.4  | 0.4  | ND   |
| MCH (pg/cell)                       | ID | mean | 7.8  | 4.7  | 3.5  | 7.1  | 7.2  | 7.6  | 8.2  | 8.4  | 7.7  | 7.7  |
|                                     |    | SD   | 0.4  | 1.7  | 2.4  | 0.3  | 0.5  | 0.7  | 0.6  | 0.1  | 0.1  | 0.7  |
| MCHC (g/dL)                         | SQ | mean | 54.0 | 40.7 | 47.0 | 49.0 | 44.3 | 48.0 | 55.0 | 57.8 | 53.5 | ND   |
|                                     |    | SD   | 2.6  | 12.7 | 1.0  | 2.0  | 10.8 | 2.2  | 3.4  | 2.5  | 3.5  | ND   |
| MCV (fL/red cell)                   | ID | mean | 54.0 | 33.0 | 23.0 | 47.3 | 49.3 | 48.8 | 55.3 | 55.7 | 52.3 | 52.0 |
|                                     |    | SD   | 2.6  | 11.5 | 15.6 | 2.1  | 4.3  | 4.1  | 0.6  | 1.5  | 1.5  | 3.6  |
| Platelets* (x1000/ $\mu$ L)         | SQ | mean | 16.0 | 12.5 | 14.6 | 15.0 | 13.8 | 15.4 | 17.4 | 17.5 | 16.4 | ND   |
|                                     |    | SD   | 0.9  | 3.9  | 0.2  | 0.5  | 3.3  | 0.6  | 1.0  | 0.8  | 1.2  | ND   |
| VEGF (pg/mL)                        | ID | mean | 16.0 | 10.0 | 7.3  | 14.9 | 15.1 | 15.6 | 17.6 | 16.8 | 15.7 | 15.8 |
|                                     |    | SD   | 0.9  | 3.7  | 5.2  | 0.6  | 1.1  | 1.6  | 0.6  | 0.5  | 0.1  | 1.1  |
| MCH                                 | SQ | mean | 20.5 | 21.1 | 21.1 | 21.3 | 21.0 | 20.8 | 20.7 | 20.2 | 20.3 | ND   |
|                                     |    | SD   | 0.6  | 0.2  | 0.3  | 0.2  | 0.3  | 0.5  | 0.5  | 0.4  | 0.5  | ND   |
| MCHC                                | ID | mean | 20.5 | 21.0 | 20.8 | 21.0 | 20.9 | 20.6 | 21.4 | 20.1 | 20.3 | 20.6 |
|                                     |    | SD   | 0.6  | 0.5  | 0.4  | 0.2  | 0.2  | 0.5  | 1.3  | 0.5  | 0.2  | 0.3  |
| MCV                                 | SQ | mean | 29.7 | 30.7 | 31.3 | 31.0 | 31.3 | 32.3 | 31.8 | 30.6 | 31.0 | ND   |
|                                     |    | SD   | 0.6  | 0.6  | 0.6  | 0.0  | 0.5  | 0.5  | 0.5  | 0.5  | 0.0  | ND   |
| Platelets*                          | ID | mean | 29.7 | 30.7 | 31.0 | 31.7 | 30.8 | 32.0 | 31.7 | 30.0 | 30.3 | 30.7 |
|                                     |    | SD   | 0.6  | 0.6  | 1.4  | 0.6  | 0.5  | 0.0  | 0.6  | 0.0  | 1.2  | 0.6  |
| VEGF                                | SQ | mean | 69.0 | 68.7 | 68.0 | 69.3 | 67.3 | 64.8 | 65.8 | 66.6 | 66.0 | ND   |
|                                     |    | SD   | 2.6  | 1.5  | 2.0  | 1.5  | 1.3  | 1.7  | 1.0  | 1.6  | 1.4  | ND   |
| Platelets*                          | ID | mean | 69.0 | 68.7 | 66.5 | 67.0 | 68.0 | 64.5 | 64.7 | 66.5 | 67.7 | 67.7 |
|                                     |    | SD   | 2.6  | 1.5  | 2.1  | 0.0  | 0.8  | 1.7  | 2.9  | 1.5  | 2.1  | 0.6  |
| Platelets*                          | SQ | mean | 1128 | 307  | 448  | 350  | 818  | 614  | 678  | 563  | 439  | ND   |
|                                     |    | SD   | 155  | 112  | 222  | 41   | 441  | 142  | 270  | 274  | 41   | ND   |
| VEGF                                | ID | mean | 1128 | 223  | 229  | 380  | 454  | 951  | 380  | 895  | 832  | 1255 |
|                                     |    | SD   | 155  | 119  | 170  | 84   | 73   | 484  | 69   | 382  | 398  | 475  |
| VEGF                                | SQ | mean | 169  | 189  | 241  | 244  | 254  | 270  | 365  | 491  | 267  | ND   |
|                                     |    | SD   | 39   | 17   | 4    | 15   | 16   | 12   | 24   | 19   | 18   | ND   |
| VEGF                                | ID | mean | 169  | 208  | 169  | 189  | 194  | 176  | 408  | 572  | 612  | 218  |
|                                     |    | SD   | 39   | 0    | 14   | 39   | 10   | 30   | 0    | 141  | 0    | 69   |

\*Reflects the minimum number due to platelet clumping.
